# Supplementary material for: Pharmacokinetic Developability and Disposition Profiles of Bispecific Antibodies: A Case Study with Two Molecules
Source: MDPI journal article supplement (doi:10.3390/antib11010002), 2021-12-28

**Figure S1:** DSC thermograms of (A) BsAb-1 and (B) BsAb-2 in PBS, pH 7.2. All domains in BsAb-2 unfold at similar temperatures so the individual domain transitions are unresolved. The total  $\Delta H$  for BsAb1 and BsAb2 are similar.

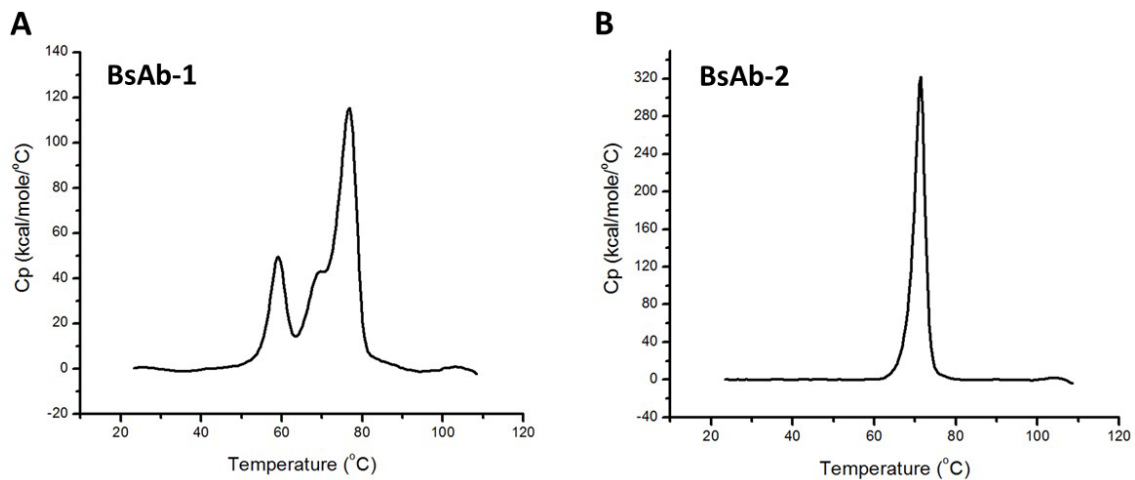

Supplement: s1 [file s1]
